# Supplementary material for: Computational identification of tissue-specific transcription factor cooperation in ten cattle tissues
Source: PubMed Central journal article supplement (PMC6522001; doi:10.1371/journal.pone.0216475), 2019-05-16

Density of expression values as logarithmized TPM-values aggregated over all genes and tissues for the identification of a threshold to clarify TF genes and TSGs as expressed. The plot shows largely bimodal distributions with a common minimum at TPM=1.46. Consequently, the local minimum was chosen as threshold.

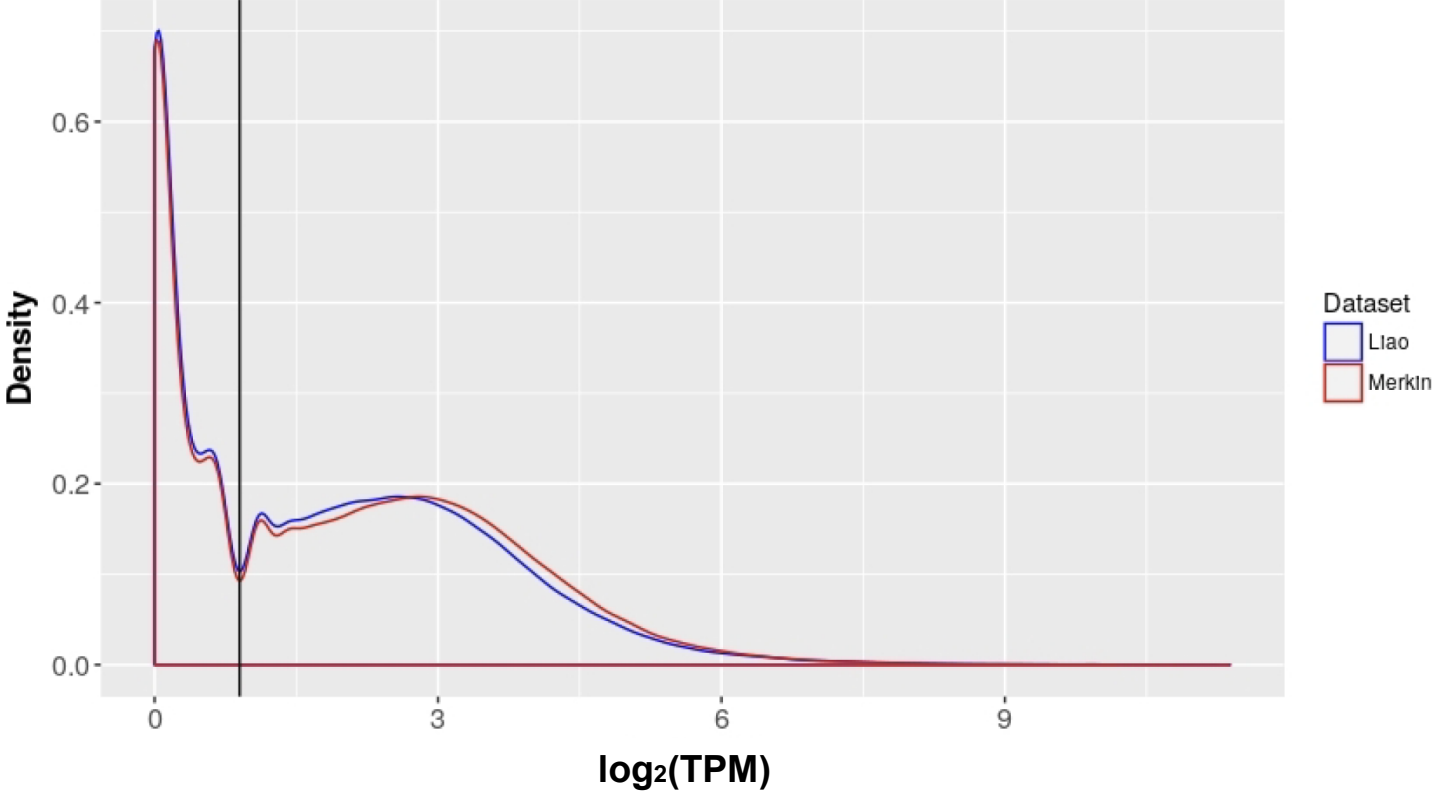

Supplement: pone.0216475.s001.pdf [file pone.0216475.s001.pdf]
