# Supplementary material for: Computational identification of tissue-specific transcription factor cooperation in ten cattle tissues
Source: PubMed Central journal article supplement (PMC6522001; doi:10.1371/journal.pone.0216475), 2019-05-16

Cooperation network for the TSG-set-specific TF pairs of adipose tissue.

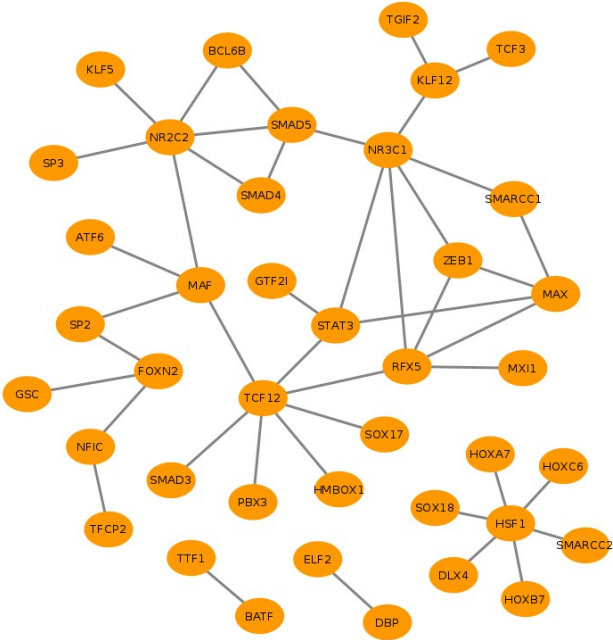

Cooperation network for the TSG-set-specific TF pairs of colon.

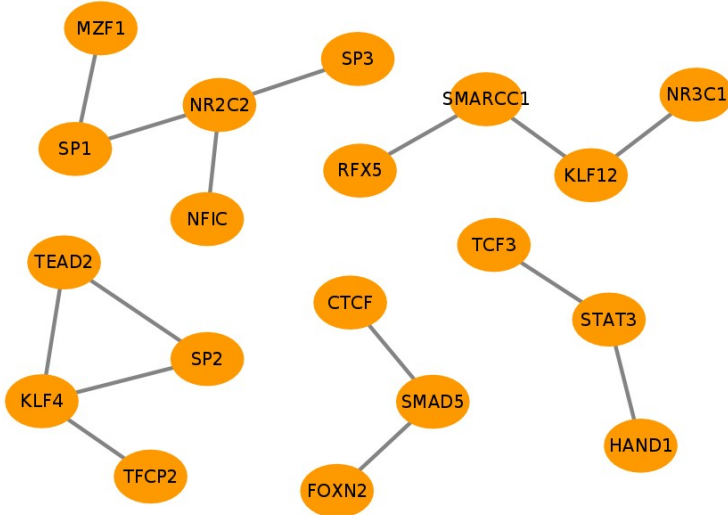

Cooperation network for the TSG-set-specific TF pairs of duodenum.

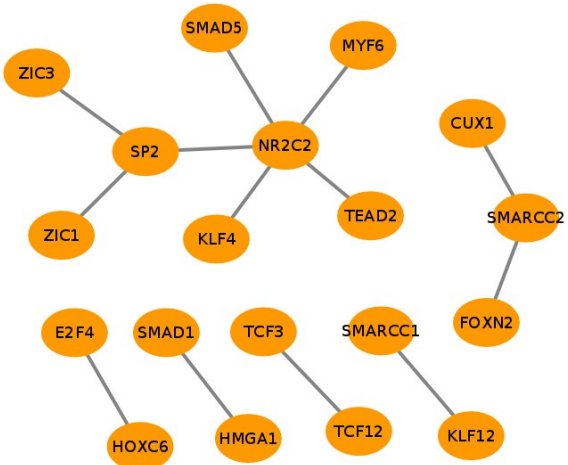

Cooperation network for the TSG-set-specific TF pairs of heart.

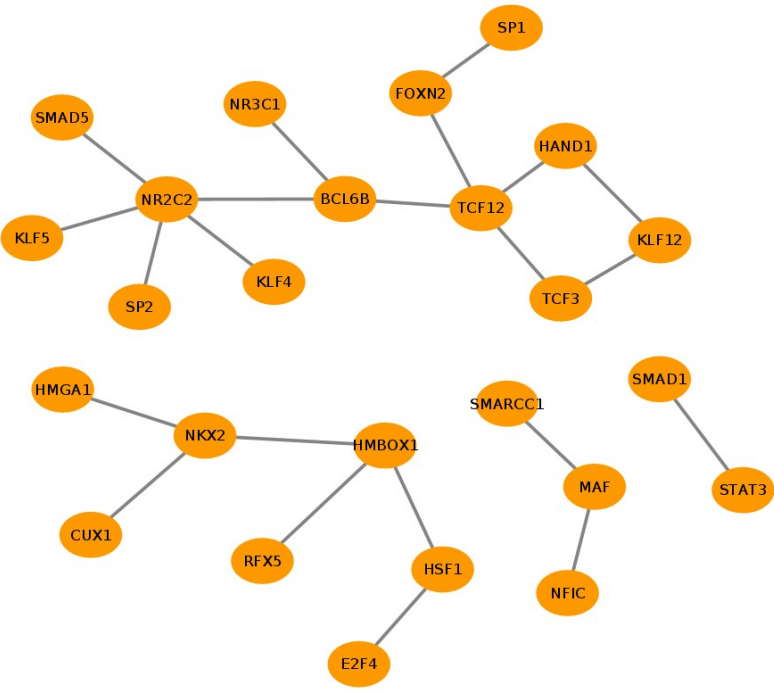

Cooperation network for the TSG-set-specific TF pairs of muscle tissue.

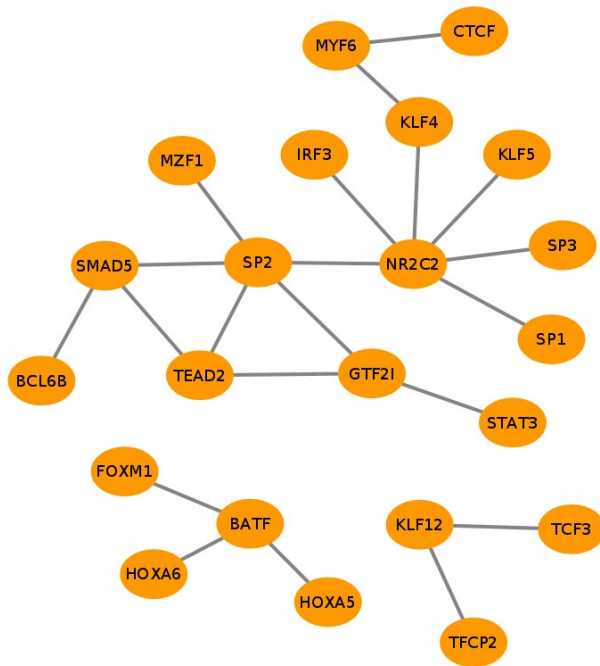

Cooperation network for the TSG-set-specific TF pairs of spleen.

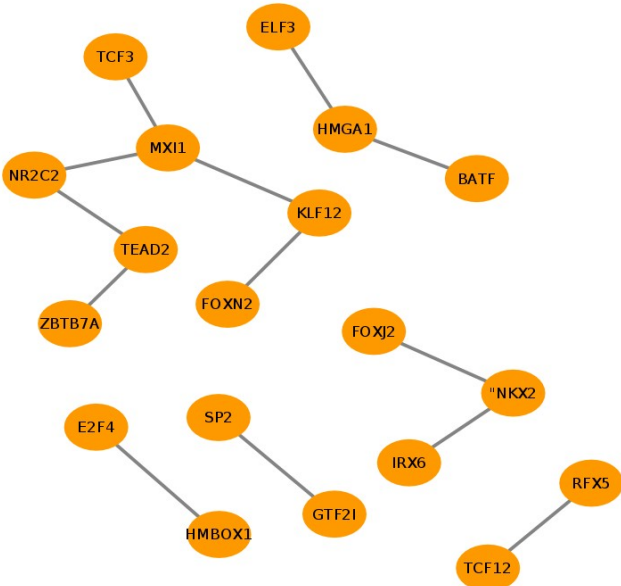

Cooperation network for the TSG-set-specific TF pairs of testis.

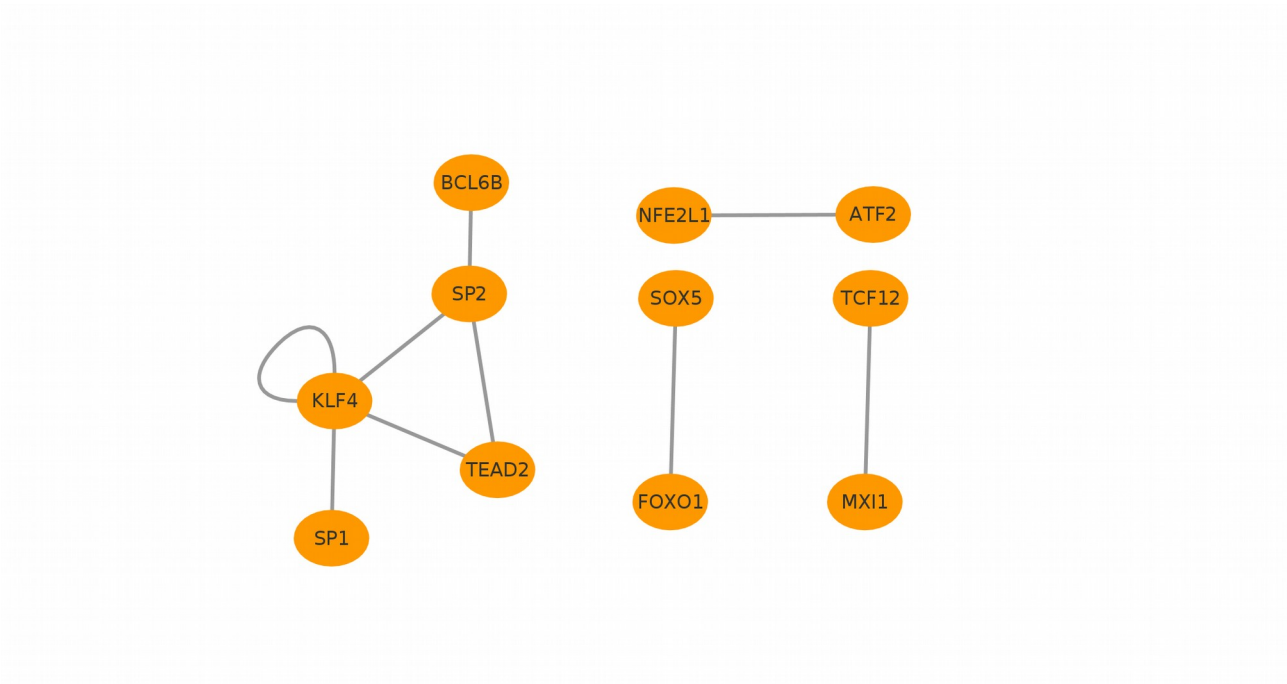

Supplement: pone.0216475.s002.pdf [file pone.0216475.s002.pdf]
